# Supplementary material for: Integration of image preprocessing and recognition functions in an optoelectronic coupling organic ferroelectric retinomorphic neuristor
Source: Royal Society of Chemistry journal article supplement (doi:10.1039/d3mh00429e), 2023-01-01
Supplement: d3mh00429e1.pdf [file d3mh00429e1.pdf]

## Supporting Information

### Integration of Image Preprocessing and Recognition Functions in an Optoelectronic Coupling Organic Ferroelectric Retinomorphic Neuristor

Qinyong Dai, Mengjiao Pei, Jianhang Guo, Qijing Wang, Ziqian Hao, Hengyuan Wang, Yating Li, Longfei Li, Kuakua Lu, Yang Yan, Yi Shi\* and Yun Li\*

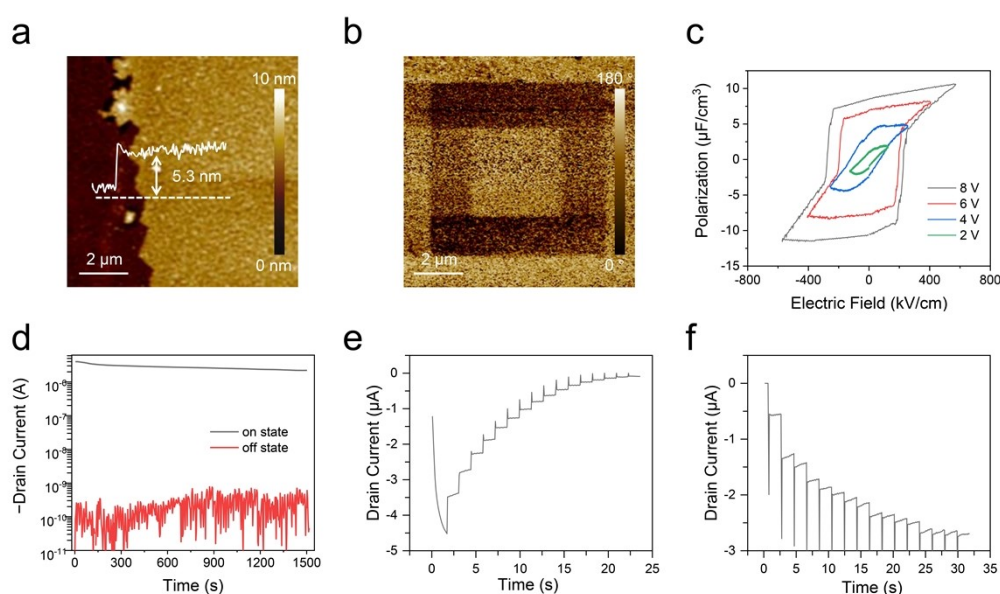

Fig. S1 Atomic force microscope (AFM), piezoresponse force microscopy (PFM), and polarization-voltage ( $P$ - $E$ ) loop characterizations of P(VDF-TrFE) thin films, and devices performance characterizations. (a) AFM height image and (b) piezoresponse force microscopy (PFM) out-of-plane phase images of the ultrathin P(VDF-TrFE) film. (c) The  $P$ - $E$  hysteresis loops of P(VDF-TrFE) films with different sweeping ranges. (d) Retention measurements of the currents in the on and off states. (e) Realization of a long-term depression through positive gate pulses (width 10 ms, amplitude 5 V). (f) Realization of a long-term potentiation through negative gate pulses (width 10 ms, amplitude -10 V).

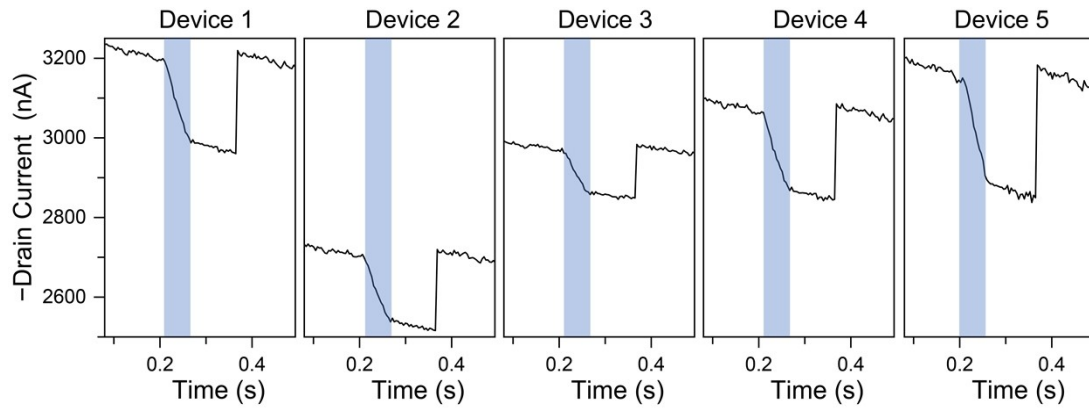

Fig. S2 Device variance of negative photoresponse in 5 different devices under light illumination at  $V_d = -1$  V.

Shadow areas represent the duration of light illumination.

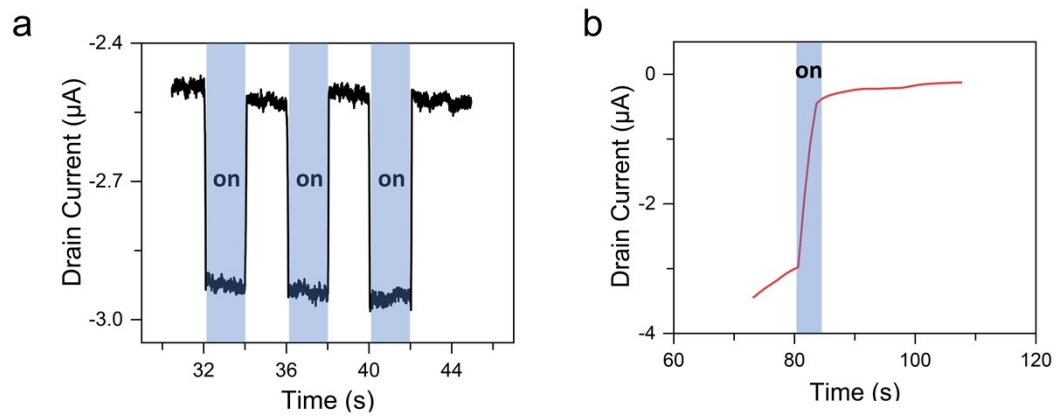

Fig. S3 A control experiment. (a) Photoresponse of the devices with PMMA layer. (b) Photoresponse of the devices without PMMA layer. The inset describes the extraction process of memory window.

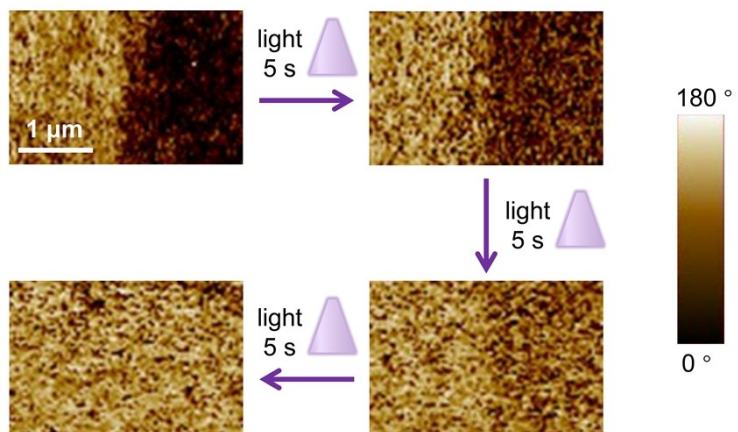

Fig. S4 The PFM phase diagrams of the devices as a function of the light exposure time (wavelengths of 365 nm, intensity of approximately 10 mW/cm<sup>2</sup>).

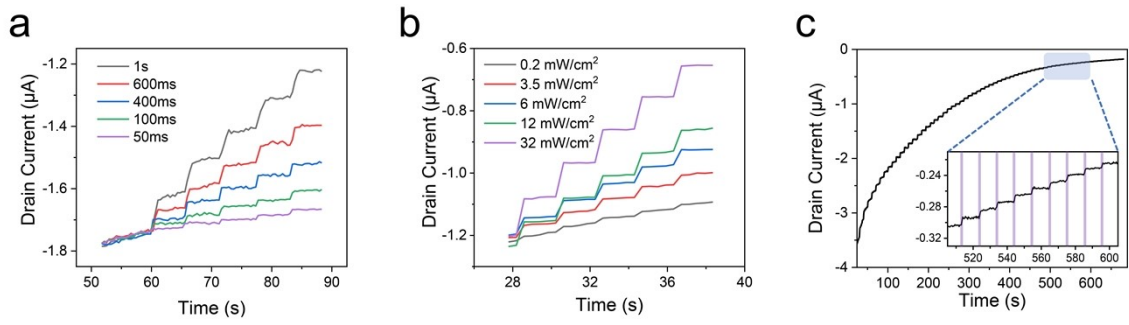

Fig. S5 The multi-level memory characteristics. (a) Time-dependent drain current under five light pulses (365 nm, 3.5  $\text{mW}/\text{cm}^2$ ) with different exposure times of 0.05, 0.1, 0.4, 0.6, and 1 s. (b) Time-dependent drain current under five light pulses (365 nm, 400 ms) with different optical powers. (c) Multilevel storage capability characterization (64 states) under light pulses (365 nm, 3.5  $\text{mW}/\text{cm}^2$ , 400 ms) every 10 s.

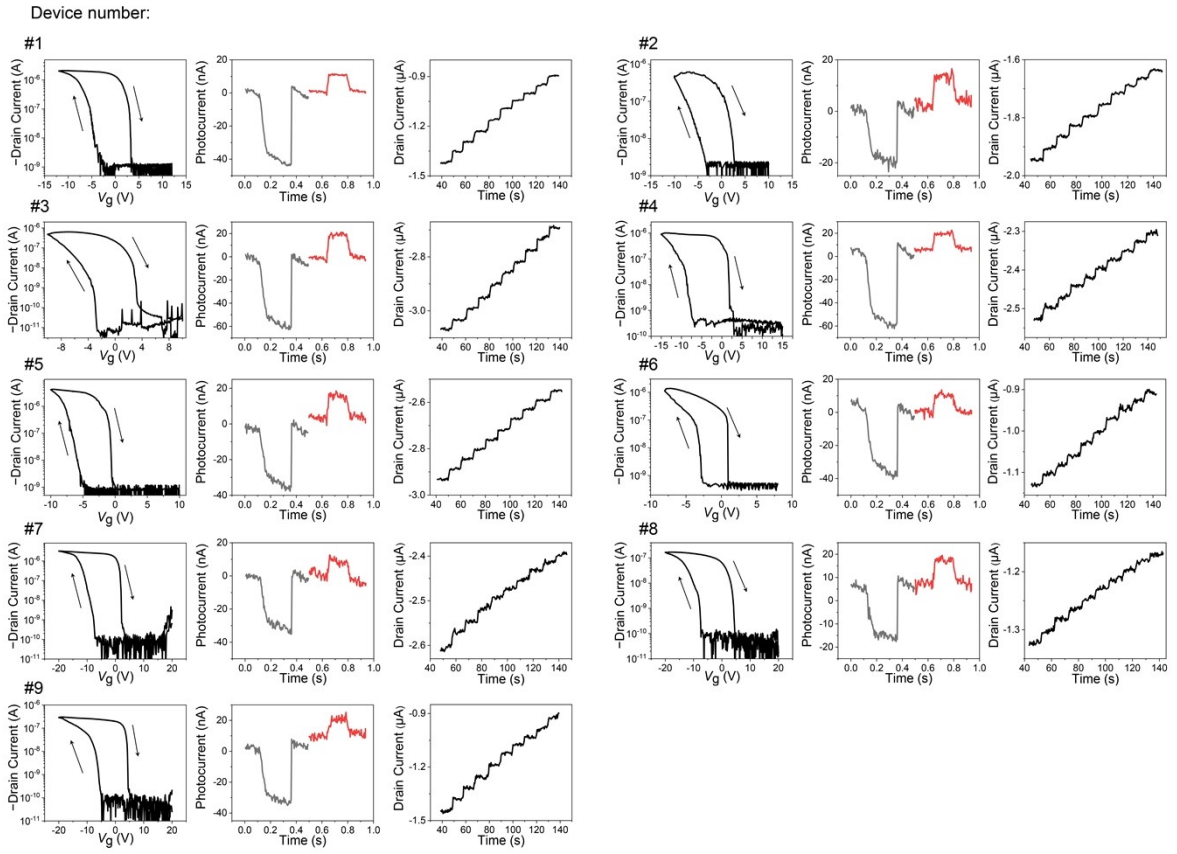

Fig. S6 Transfer curves, bidirectional photoresponse characteristics, and multi-level memory characteristics by optical modulation of the 9 devices.

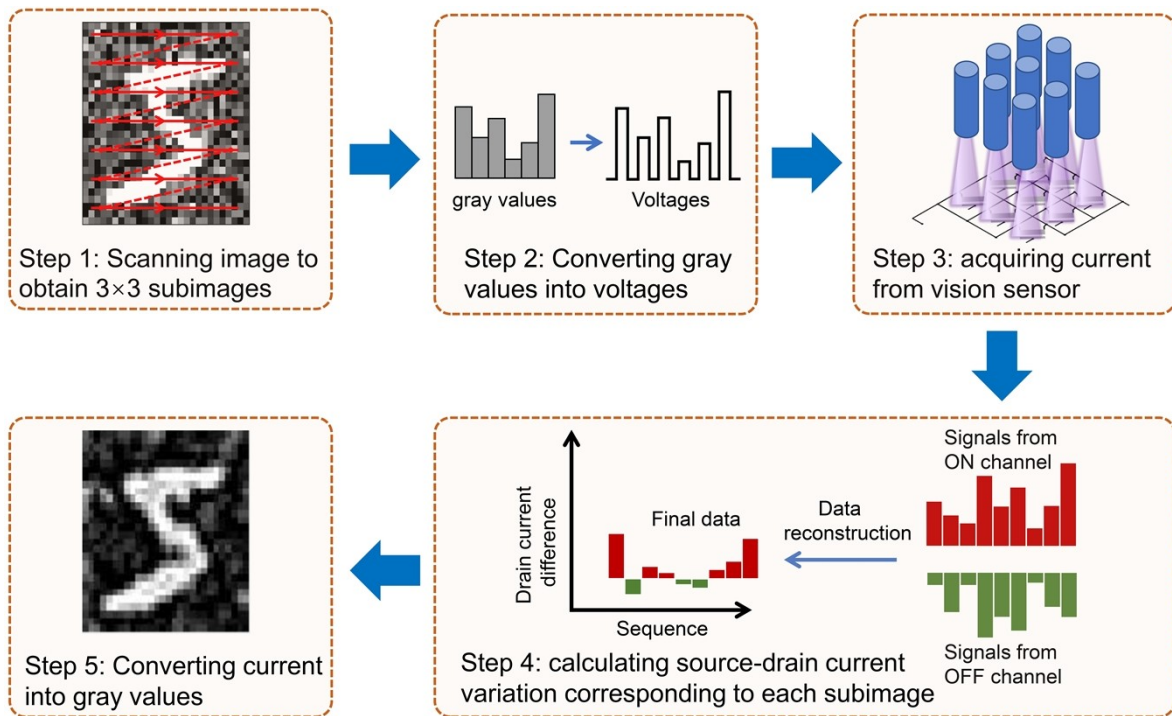

Fig. S7 The specific operation process of image preprocessing.

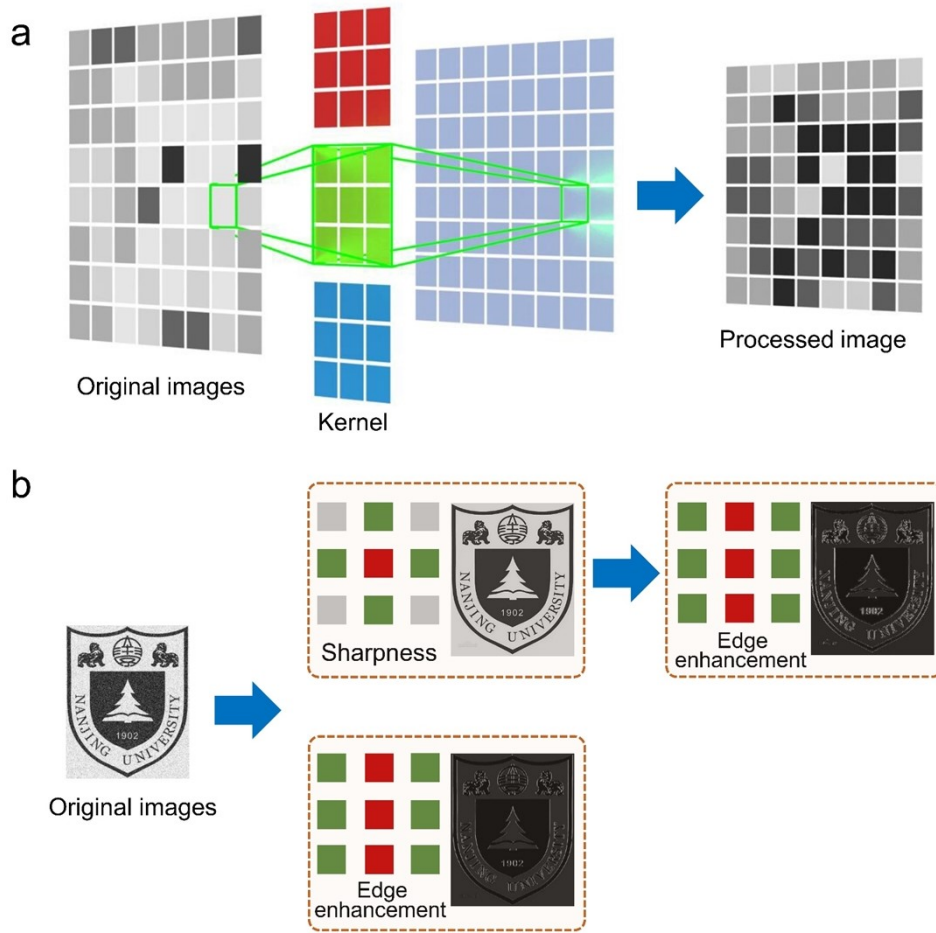

Fig. S8 Reconfigurable retinomorphic vision sensor for simultaneous image sensing and processing. (a) Vision sensor for simultaneous image sensing and processing. (b) Demonstration of image processing with different operations (i.e., edge enhancement and sharpness). These operations are realized by controlling the photoresponse of each pixel in the sensor by varying  $V_g$  independently.



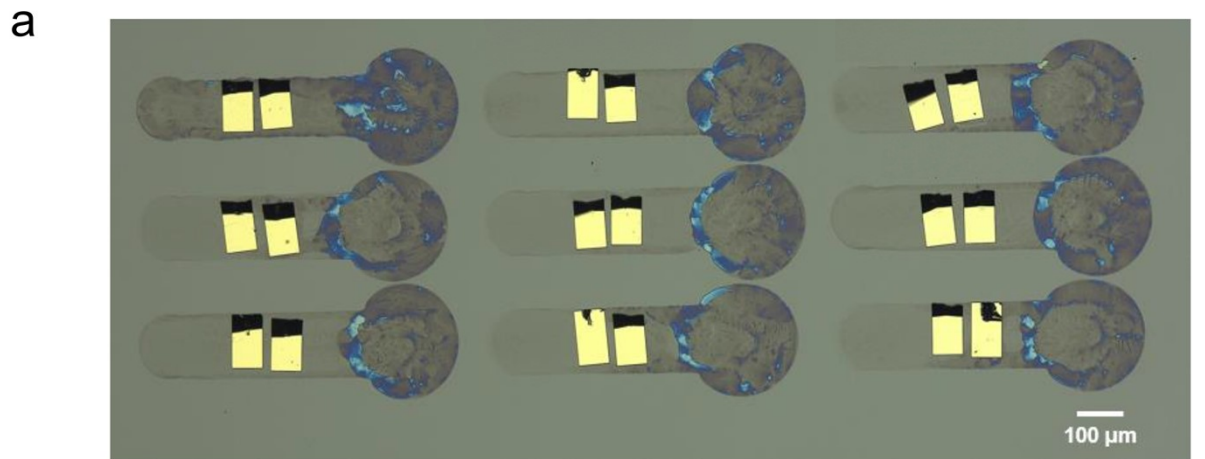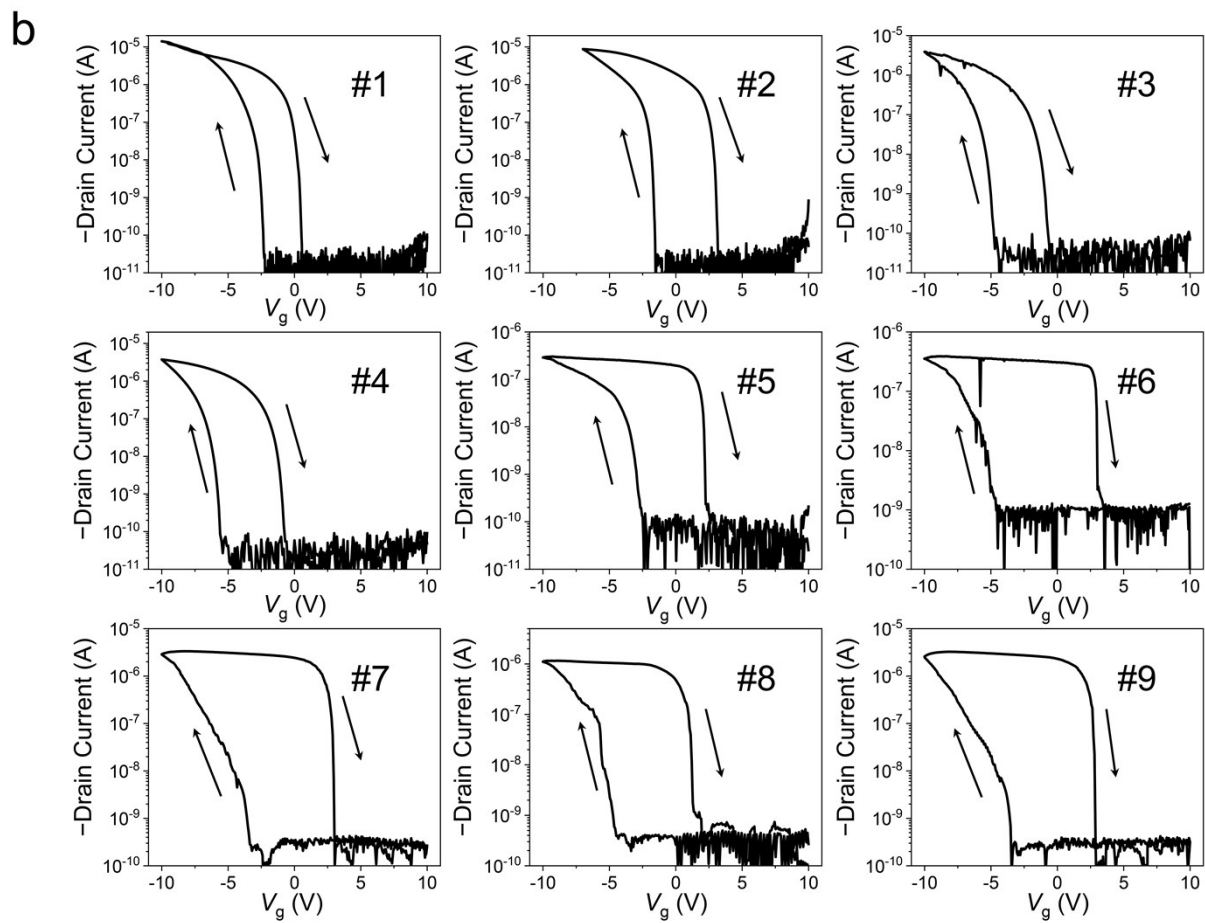

Fig. S9 (a) Optical microscope image and (b) transfer curves of the 3×3 organic ferroelectric retinomorph neuristors-based sensor array.

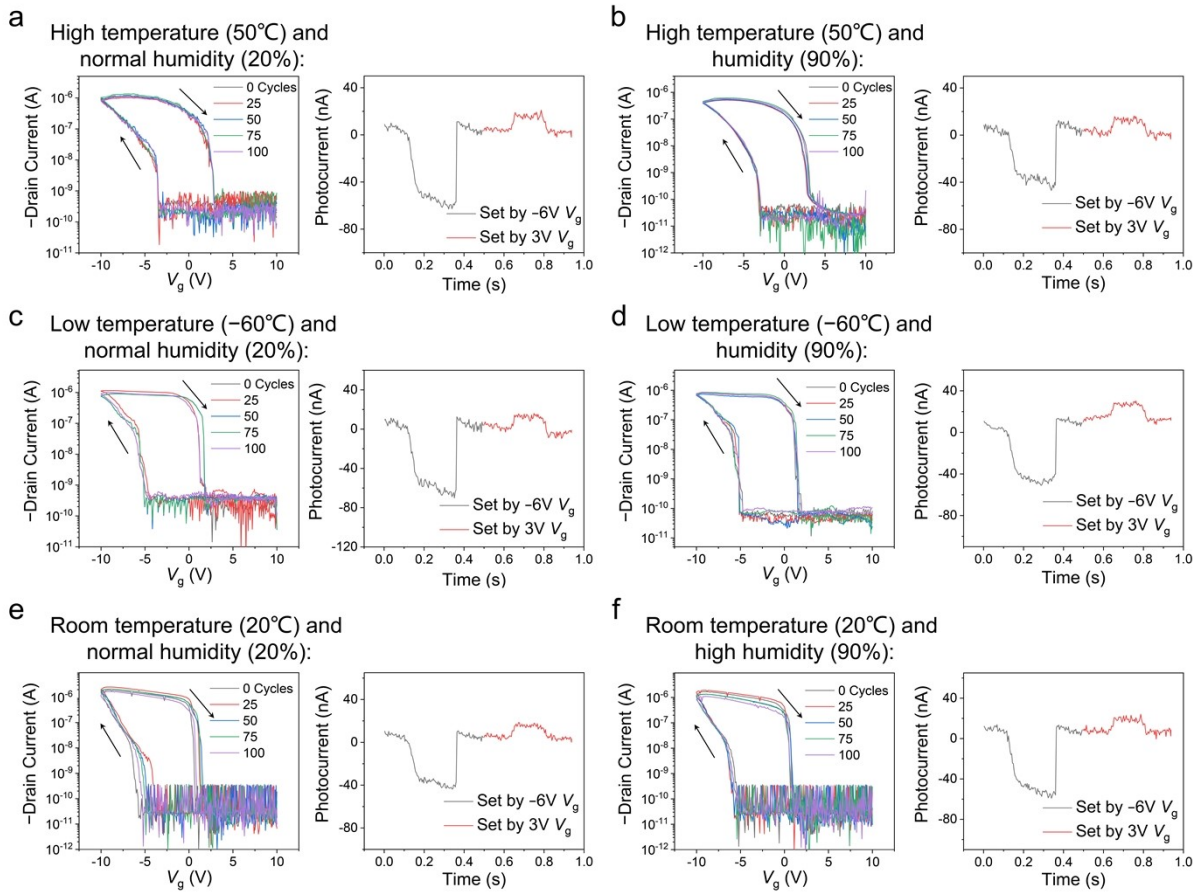

Fig. S10 The stability measurements of our devices encapsulated by the parylene films in harsh environments. The testing time for 100 cycles is one hour. (a) High temperature (50 °C) and normal humidity (20 %), (b) high temperature (50 °C) and humidity (90 %), (c) low temperature (-60 °C) and normal humidity (20 %), (d) low temperature (-60 °C) and humidity (90 %), (e) room temperature (20 °C) and normal humidity (20 %), (f) room temperature (20 °C) and high humidity (90 %).

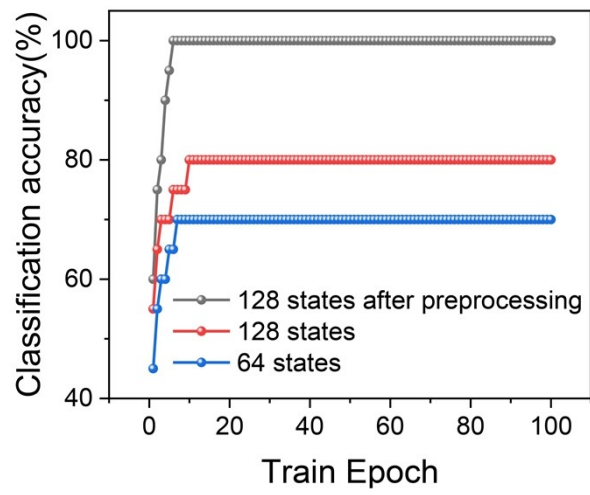

Fig. S11 Comparison of classification recognition rates using different states with and without preprocessing.

Table S1. Comparison among the recently developed image recognition systems based on different devices. CNN: convolutional neural network; FCNN: full-connected neural network.

| Materials system                          | Structure              | Function                                  | Network type | Accuracy | Ref.      |
|-------------------------------------------|------------------------|-------------------------------------------|--------------|----------|-----------|
| Pyr-GDY/Graphene/Pb                       | photodiode             | recognition                               | FCNN         | 90%      | 1         |
| MoS <sub>2</sub> /PtTe <sub>2</sub>       | transistor             | recognition                               | FCNN         | 80%      | 2         |
| Graphene/WSe <sub>2</sub>                 | transistor             | recognition                               | CNN          | 72%      | 3         |
| Graphene/MoS <sub>2</sub>                 | transistor             | recognition                               | FCNN         | 92%      | 4         |
| HfS <sub>2</sub>                          | transistor             | recognition                               | CNN          | 88%      | 5         |
| C <sub>8</sub> -BTBT/F <sub>16</sub> CuPc | a two-terminal synapse | preprocessing                             | -            | -        | 6         |
| Graphene/PM6:Y6                           | transistor             | retinomorphic preprocessing               | -            | -        | 7         |
| WSe <sub>2</sub>                          | a two-terminal synapse | retinomorphic preprocessing               | -            | -        | 8         |
| PDPP3T:PCBM                               | transistor             | visual adaption                           | -            | -        | 9         |
| In <sub>2</sub> O <sub>3</sub>            | transistor             | visual adaption                           | -            | -        | 10        |
| MoS <sub>2</sub>                          | transistor             | visual adaption & recognition             | CNN          | 96%      | 11        |
| α-In <sub>2</sub> Se <sub>3</sub>         | transistor             | visual adaption & recognition             | CNN          | 93%      | 12        |
| MoS <sub>2</sub> /LSMO                    | transistor             | preprocessing & recognition               | CNN          | 90%      | 13        |
| ZnO + Mo/SiO <sub>2</sub> /W              | transistor + memristor | preprocessing & recognition               | FCNN         | 99%      | 14        |
| MoO <sub>3</sub> /Pd/SiO <sub>2</sub>     | random access memory   | preprocessing & recognition               | CNN          | 99%      | 15        |
| BP                                        | transistor             | preprocessing & recognition               | CNN          | 92%      | 16        |
| WSe <sub>2</sub> /h-BN + HfO <sub>x</sub> | transistor + memristor | retinomorphic preprocessing & recognition | CNN          | 100%     | 17        |
| C <sub>8</sub> -BTBT/PMMA/P(VDF-TrFE)     | transistor             | retinomorphic preprocessing & recognition | CNN          | 90%      | this work |

## Materials and Methods

### Fabrication of P(VDF-TrFE) and C<sub>8</sub>-BTBT films

HfO<sub>2</sub> with a thickness of 25 nm was deposited on highly doped n-type Si substrates by atomic layer deposition technology. Then, the substrates were ultrasonically cleaned with acetone, isopropanol and deionized water for 15 minutes. P(VDF-TrFE) (70:30 molar ratio) purchased from Solvay Inc. was dissolved in a mixture of DMF, and the counter solvent p-anisaldehyde (0.5 wt%) at a concentration of 0.5 wt%. 3.5  $\mu$ L solution was dropped onto the substrate. Moreover, a P(VDF-TrFE) film was obtained with antisolvent-assisted crystallization technology under nitrogen conditions. The substrate with P(VDF-TrFE) was left standing in nitrogen for 12 hours to fully evaporate the solvent. C<sub>8</sub>-BTBT (0.5 wt%) and PMMA (0.1 wt%) were dissolved in a mixture of anisole and p-anisaldehyde (0.5 wt%). Subsequently, PMMA/C<sub>8</sub>-BTBT thin films were formed on the P(VDF-TrFE) layer through vertical phase separation by the same method.

### Device Fabrication

Au electrodes with a thickness of 100 nm and an area of 30  $\times$  90  $\mu$ m<sup>2</sup> were transferred onto C<sub>8</sub>-BTBT films as source and drain electrodes. The channel length and width of the devices were defined as 80 and 20  $\mu$ m, respectively.

### Electrical and Optoelectrical Characterizations of Organic Ferroelectric Retinomorphonic Neuristors

A semiconductor device analyzer (Agilent B1500) was used to test the electrical characteristics of the devices under vacuum conditions of 10<sup>-3</sup> Torr. A 365 nm ultraviolet light emitting diode (LED) was used as the light source to measure the optoelectrical performance of the devices, where the light pulse signal was generated by a signal generator. AFM characterizations were performed using a scanning probe microscope (SPA-400) controlled by an SPI 4000 probe station (Seiko Instruments). PFM characterizations were performed with an Asylum Research Cypher scanning probe microscope (Asylum Research, Oxford Instruments, China). *P-E* hysteresis loops were performed with a PREMIER II ferroelectric analyzer.

## References

- 1 Y. X. Hou, Y. Li, Z. C. Zhang, J. Q. Li, D. H. Qi, X. D. Chen, J. J. Wang, B. W. Yao, M. X. Yu, T. B. Lu and J. Zhang, *ACS Nano*, 2021, **15**, 1497–1508.
- 2 M. M. Islam, A. Krishnaprasad, D. Dev, R. Martinez-Martinez, V. Okonkwo, B. Wu, S. S. Han, T. S. Bae, H. S. Chung, J. Touma, Y. Jung and T. Roy, *ACS Nano*, 2022, **16**, 10188–10198.
- 3 S. H. Kim, M. U. Park, C. Lee, S. G. Yi, M. Kim, Y. Choi, J. H. Cho and K. H. Yoo, *Nanoscale Adv.*, 2021, **3**, 4952–4960.
- 4 J. Yu, X. Yang, G. Gao, Y. Xiong, Y. Wang, J. Han, Y. Chen, H. Zhang, Q. Sun and Z. L. Wang, *Sci. Adv.*, 2021, **7**, eabd9117.
- 5 H. Xiong, L. Xu, C. Gao, Q. Zhang, M. Deng, Q. Wang, J. Zhang, D. Fuchs, W. Li, A. Cui, L. Shang, K. Jiang, Z. Hu and J. Chu, *ACS Appl. Mater. Interfaces*, 2021, **13**, 50132–50140.
- 6 Z. Hao, H. Wang, S. Jiang, J. Qian, X. Xu, Y. Li, M. Pei, B. Zhang, J. Guo, H. Zhao, J. Chen, Y. Tong, J. Wang, X. Wang, Y. Shi and Y. Li, *Adv. Sci.*, 2022, **9**, eabd9117.
- 7 C. Han, X. Liu, X. Han, M. He, J. Han, H. Zhang, X. Hou, H. Zhou, H. Yu, Z. Wu, J. Gou and J. Wang, *Adv. Funct. Mater.*, 2022, **32**, 2209680.
- 8 L. Mennel, J. Symonowicz, S. Wachter, D. K. Polyushkin, A. J. Molina-Mendoza and T. Mueller, *Nature*, 2020, **579**, 62–66.
- 9 Z. He, H. Shen, D. Ye, L. Xiang, W. Zhao, J. Ding, F. Zhang, C. an Di and D. Zhu, *Nat. Electron.*, 2021, **4**, 522–529.
- 10 C. Jin, W. Liu, Y. Xu, Y. Huang, Y. Nie, X. Shi, G. Zhang, P. He, J. Zhang, H. Cao, J. Sun and J. Yang, *Nano Lett.*, 2022, **22**, 3372–3379.
- 11 F. Liao, Z. Zhou, B. J. Kim, J. Chen, J. Wang, T. Wan, Y. Zhou, A. T. Hoang, C. Wang, J. Kang, J. H. Ahn and Y. Chai, *Nat. Electron.*, 2022, **5**, 84–91.
- 12 Y. Cai, F. Wang, X. Wang, S. Li, Y. Wang, J. Yang, T. Yan, X. Zhan, F. Wang, R. Cheng, J. He and Z. Wang, *Adv. Funct. Mater.*, 2022, **33**, 2212917.
- 13 J. Du, D. Xie, Q. Zhang, H. Zhong, F. Meng, X. Fu, Q. Sun, H. Ni, T. Li, E. jia Guo, H. Guo, M. He, C. Wang, L. Gu, X. Xu, G. Zhang, G. Yang, K. Jin and C. Ge, *Nano Energy*, 2021, **89**, 106439.
- 14 B. Dang, K. Liu, X. Wu, Z. Yang, L. Xu, Y. Yang and R. Huang, *Adv. Mater.*, 2022, **22**, 2204844.
- 15 F. Zhou, Z. Zhou, J. Chen, T. H. Choy, J. Wang, N. Zhang, Z. Lin, S. Yu, J. Kang, H. S. P. Wong and Y. Chai, *Nat. Nanotechnol.*, 2019, **14**, 776–782.
- 16 S. Lee, R. Peng, C. Wu and M. Li, *Nat. Commun.*, 2022, **13**, 1485.
- 17 S. Wang, C. Y. Wang, P. Wang, C. Wang, Z. A. Li, C. Pan, Y. Dai, A. Gao, C. Liu, J. Liu, H. Yang, X. Liu, B. Cheng, K. Chen, Z. Wang, K. Watanabe, T. Taniguchi, S. J. Liang and F. Miao, *Natl. Sci. Rev.*, 2021, **8**, 10–14.
